# Supplementary material
Source: PubMed Central journal article supplement (PMC11028111)
Supplement: 262_2017_2108_MOESM1_ESM.pdf [file 262_2017_2108_MOESM1_ESM.pdf]

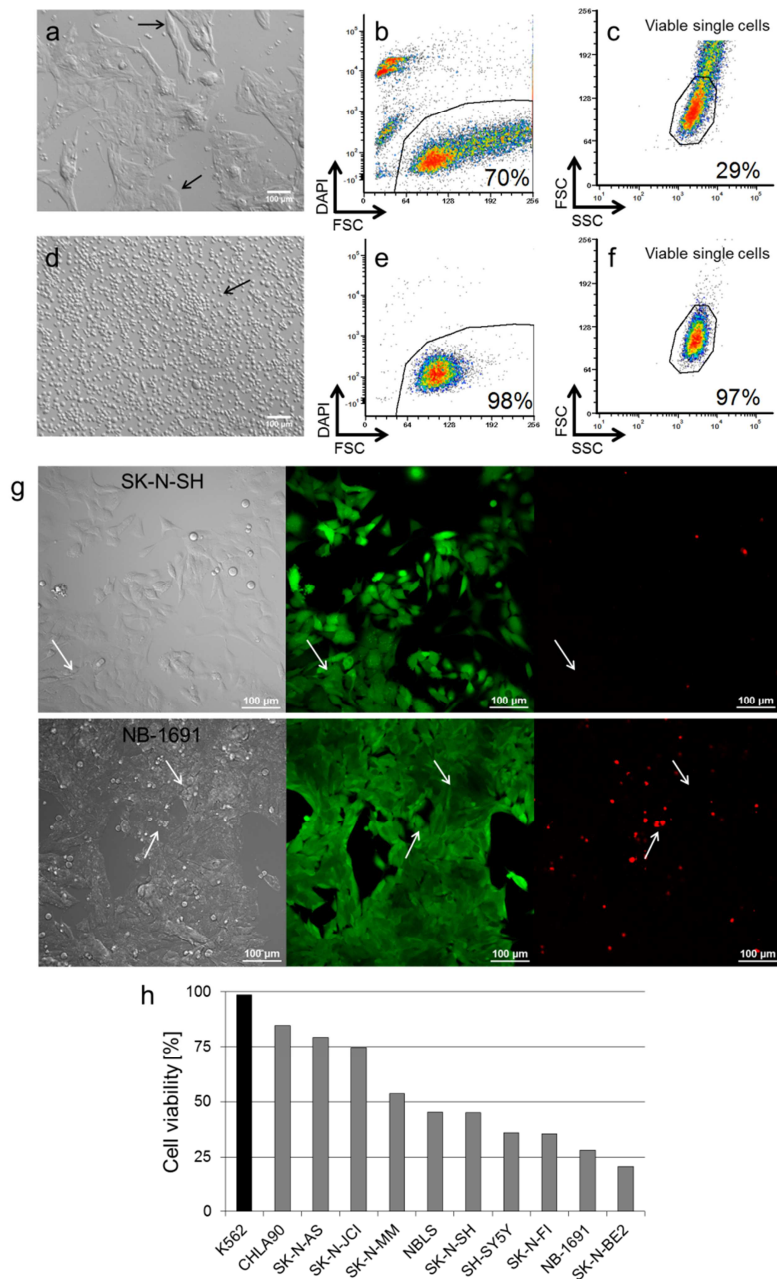

**Supplementary Figure 1** Detachment of neuroblastoma cell lines from culture greatly reduces cell viability. **a,d** The adherent neuroblastoma cell line NB-1691 (**a**) and non-adherent erythroid leukemia cell lines K562 (**d**) were grown to subconfluence for comparison. Cell viability was assessed with flow cytometry by using 4',6-diamidino-2-phenylindole as a viability dye (**b-f**). **g** SK-N-SH and NB-1691 were stained at a subconfluent state with the live-cell stain calcein-AM (green) and dead-cell stain ethidium bromide (red) for evaluation of cell viability prior to detachment from culture. Cells were imaged with differential interference contrast and fluorescence microscopy. The majority of cells are viable in culture. Arrows facilitate comparison of the same area in between the different imaging modalities. **h** Following detachment from culture, cell viability for each neuroblastoma cell line (grey bars) is plotted against K562 (black bar). The percentage of viable single cells ranges from 21% (SK-N-BE2) to 84% (CHLA90).

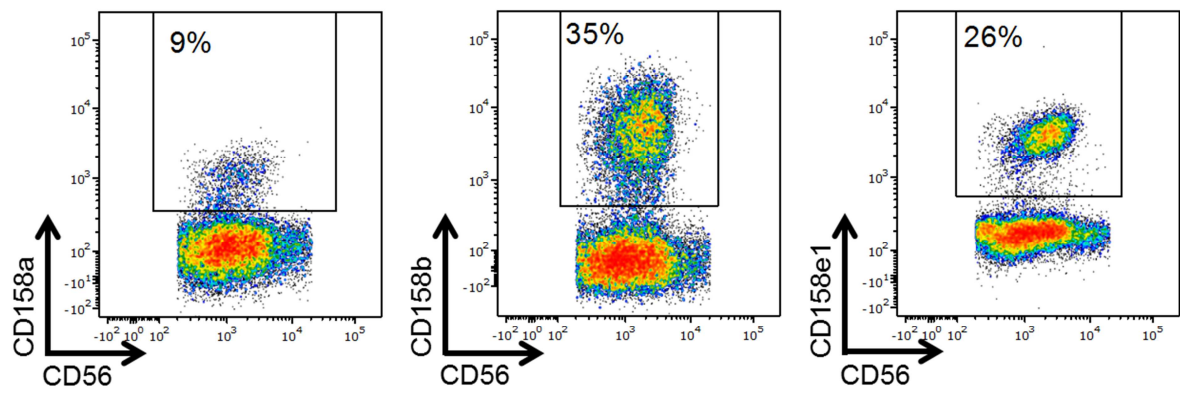

**Supplementary Figure 2** KIR phenotype analysis by flow cytometry.

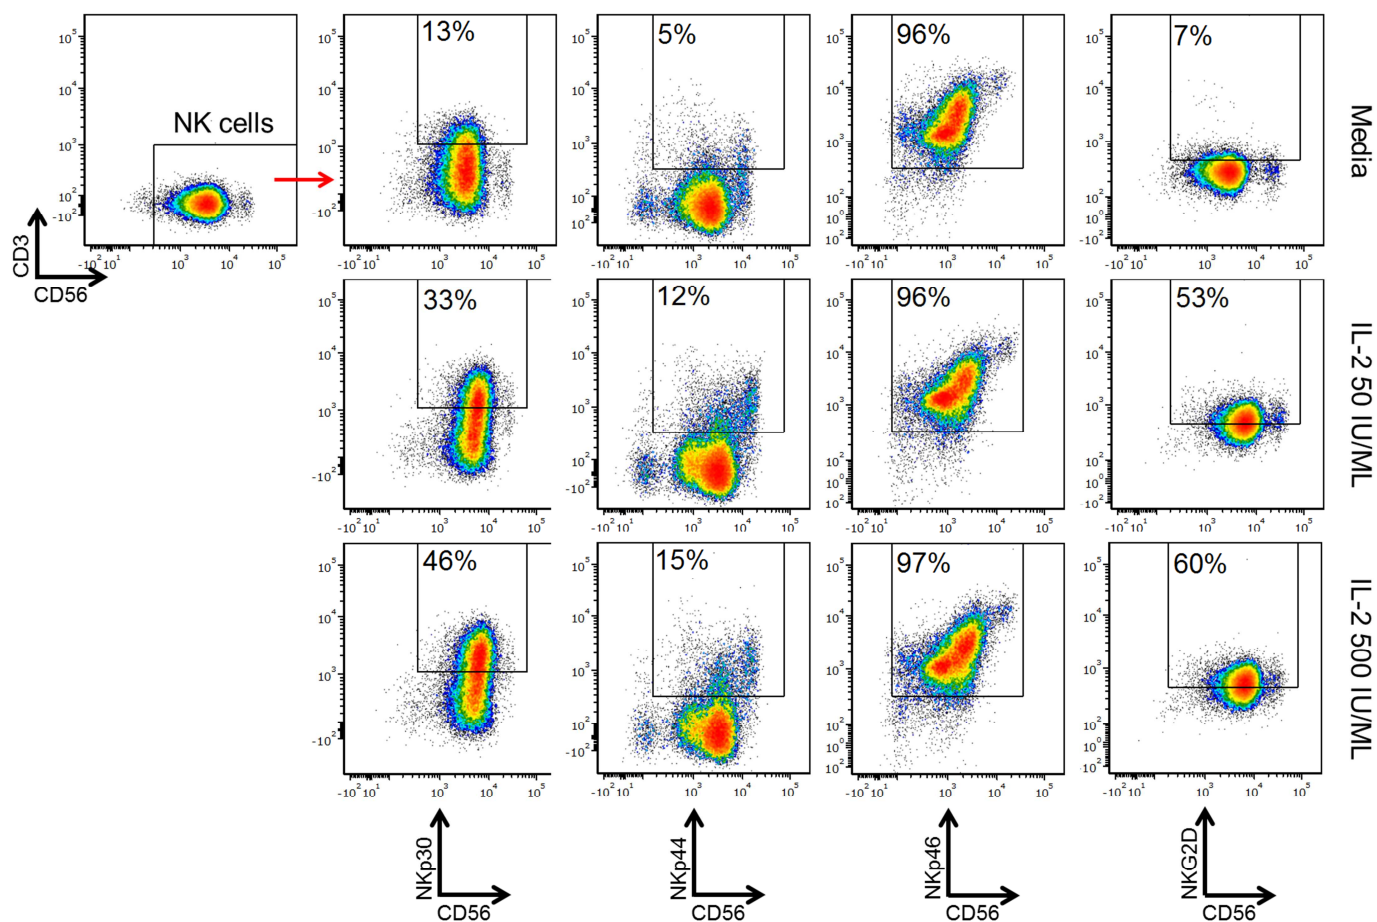

Supplementary Figure 3 Example of flow cytometry analysis of natural cytotoxicity receptors in IL-2-stimulated NK cells.

**Supplementary Table 1** Characterization of neuroblastoma cell lines.

| Neuroblastoma cell line | HLA genotype   | KIR mismatch | HLA expression <sup>1</sup> | GD2 expression <sup>2</sup> | Cell type <sup>3</sup> | Differentiation <sup>4</sup> |
|-------------------------|----------------|--------------|-----------------------------|-----------------------------|------------------------|------------------------------|
| CHLA90                  | C*05:01, 12:03 | CD158e1      | Intermediate                | High                        | S                      | Poor                         |
| NB-1691                 | C*05, 07:01    | CD158e1      | Low                         | High                        | I                      | Good                         |
| NBLS                    | C*02, 06       | CD158b       | Low                         | High                        | N                      | Poor                         |
| SK-N-AS                 | C*08, 03:04    | CD158a       | Normal                      | High                        | S                      | Poor                         |
| SK-N-BE2                | C*04, 07:01    | No mismatch  | Low                         | Intermediate                | I                      | Good                         |
| SK-N-FI                 | C*04, 07:01    | No mismatch  | Intermediate                | High                        | N                      | Good                         |
| SK-N-Jci                | C*12:03, 03:04 | CD158a       | Normal                      | High                        | S                      | Poor                         |
| SK-N-MM                 | C*04, 12:03    | No mismatch  | Normal                      | High                        | I                      | Good                         |
| SK-N-SH                 | C*07:01, 07:01 | CD158a       | Low                         | Intermediate                | I                      | Good                         |
| SH-SY5Y                 | C*07:01, 07:01 | CD158a       | Low                         | Low                         | N                      | Good                         |

<sup>1</sup>Normal: comparable to buffy coat; low: comparable to K562; intermediate: in between buffy coat and K562  
<sup>2</sup>High: MFI ratio  $\geq 90$ ; intermediate: MFI ratio  $< 90$  and  $\geq 25$ ; Low: MFI ratio  $< 25$   
<sup>3</sup>N-type:  $\geq 90\%$  of cells have neurite outgrowth; S-type: cells  $\geq 90\%$  of cells do not have neurite outgrowth; I-type: neither criteria for N or S-type cells are met  
<sup>4</sup>Good:  $\geq 50\%$  of cells have neurite outgrowth after ATRA exposure; Poor:  $< 50\%$  have neurite outgrowth after ATRA exposure

**Supplementary Table 2** HLA and KIR genotype information on donors used for experiment to study CD107a expression of NK cells following ADCC.

| Donor | HLA genotype |    |    |    |    |    |     | Licensed KIR <sup>1</sup> |        |      | KIR genotype |      |      |      |                    |      | KIR mismatch |
|-------|--------------|----|----|----|----|----|-----|---------------------------|--------|------|--------------|------|------|------|--------------------|------|--------------|
|       | A            | A  | B  | B  | C  | C  | Bw4 | 2DL1                      | 2DL2/3 | 3DL1 | 2DL1         | 2DL2 | 2DL3 | 3DL1 | 3DL1v <sup>2</sup> | 3DS1 |              |
| 1     | 02           | 03 | 07 | 07 | 07 | 07 | -   | -                         | +      | -    | +            | -    | +    | -    | +                  | +    | 2DL1         |
| 2     | 01           | 02 | 27 | 52 | 02 | 12 | +   | +                         | +      | +    | +            | +    | +    | +    | -                  | -    | -            |
| 3     | 03           | 31 | 07 | 40 | 03 | 07 | -   | -                         | +      | -    | +            | +    | +    | +    | -                  | +    | 2DL1, 3DL1   |

<sup>1</sup>KIRs that are inhibited by the donor's HLA

<sup>2</sup>KIR3DL1 variant: this KIR is expressed intracellularly and therefore regarded as functionally negative.

<sup>3</sup>KIR3DS1 is listed because it is co-expressed with the KIR3DL1 variant
